# Supplementary material
Source: PubMed Central journal article supplement (PMC4060696)
Supplement: 1321207111_pnas.201321207SI.pdf [file 1321207111_pnas.201321207SI.pdf]

# Supporting Information

Ivatt et al. 10.1073/pnas.1321207111

## SI Materials and Methods

**Reagents and Antibodies.** Carbonyl cyanide *m*-chlorophenyl hydrazone (CCCP; Sigma) was prepared in ethanol and used at a final concentration of 10  $\mu$ M. Paraquat (Sigma–Aldrich) was prepared in water and used at a final concentration of 10 mM. Genistein (Sigma) was prepared in DMSO and used over a range of concentrations from 10 to 100  $\mu$ M. Antibodies used for immunoblotting were anti-light chain 3 (anti-LC3; Sigma), anti-PTEN-induced kinase 1 (PINK1) (Novus), anti-Parkin (Abcam), antiactin (Millipore), antitubulin (Sigma), goat anti-mouse IgG horseradish peroxidase (HRP; Abcam) and goat anti-rabbit IgG HRP (Invitrogen). Antibodies used for immunofluorescence were anti-ATP5A (Mitosciences), anti-GFP (Abcam), Alexa Fluor 488 anti-rabbit (Molecular Probes), and Alexa Fluor 594 anti-mouse (Molecular Probes).

**Immunofluorescence and Dyes.** Cells were cultured in eight-well chamber slides (BD Bioscience) and fixed in ice-cold methanol. Samples were blocked in 1% BSA for 30 min at room temperature before antibody application. The nucleic acid binding dye, Hoechst 33342 (Molecular Probes), was added for 10 min before sample mounting with MOWIOL 4-88 (Calbiochem). Microscopy was performed using a Deltavision RT Deconvolution Widefield microscope or an Olympus FV1000 Fluoview Confocal microscope with a U Plan S Apo N.A. 1.40 100 $\times$  objective or a Plan Apo N.A. 1.42 60 $\times$  objective.

**High-Content Screening. Confirmation screens.** dsRNA probes corresponding to primary screen hits were arrayed across three 384-well plates and underwent four rounds of confirmation screens, following the same protocol as primary screening.

**Secondary screens.** Three secondary screens were performed on confirmed primary hits. Paraquat-induced Parkin translocation and mitochondrial perinuclear clustering assays involved seeding 6,000 cells of a Schneider 2 receptor plus (S2R+) cell line stably expressing pMK33-Parkin-GFP into clear-bottomed, dsRNA-containing 384-well plates as in the primary screen. Cells were treated with 10 mM paraquat for 24 h before fixation with ice-cold methanol. Assays were performed in triplicate. Parkin translocation image acquisition and analysis methodologies corresponded to primary screening. Mitochondrial perinuclear clustering assays were acquired using a Plan Fluor N.A. 0.30 10 $\times$  objective (Nikon), with four images per well. Images were quantified manually using a three-point scoring system, where 1 represents diffuse mitochondria, 2 represents a mixture of diffuse and aggregated mitochondria, and 3 represents aggregated mitochondria. Mitochondrial morphology analysis used nontoxified S2R+ cells, seeded as in the primary screen. After 4 d, the medium was replaced with Schneider's medium (SM) containing MitoTracker Red (Molecular Probes) and Hoechst dye, and incubated for 15 min. That medium was replaced with SM, and samples were imaged live using a CFI S Plan Fluor N.A. 0.60 40 $\times$  objective (Nikon) at nine images per well. Mitochondrial morphology was assessed manually using a four-point scoring scheme, where 1 indicates fragmented, 2 indicates WT, 3 indicates fused, and 4 indicates clumped. All scoring was done with the experimenter blinded to the conditions.

**HeLa screens.** We used a custom library of human siRNA probes comprising 84 siGENOME SMARTpool siRNAs (Dharmacon). siRNAs were arrayed over two clear-bottomed 96-well plates (Greiner) at a final concentration of 25 nM. Screening analyzed Parkin translocation and mitophagy in a HeLa cell line stably expressing pLVX-Puro-YFP-Parkin. Dharmafect 1 transfection

reagent (Dharmacon) was added to siRNA-containing plates according to the manufacturer's instructions, and cells were plated in antibiotic-free media. Plates were sealed and incubated for 4 d (Parkin translocation) or 3 d (mitophagy) before the addition of CCCP-containing media for 4 h (Parkin translocation) or 24 h (mitophagy). Cells were fixed with ice-cold methanol and processed for imaging. Nine images per well were captured using a Plan Fluor N.A. 0.30 10 $\times$  objective (Nikon). Images were analyzed manually using a five-point scoring scheme. In each case, a score of 0 indicates dead or low YFP-expressing cells. The degree of Parkin translocation was assessed, where 1 indicates <10% translocation, 2 indicates 10–50% translocation, 3 indicates 50–90% translocation, and 4 indicates >90% translocation. The degree of mitophagy was assessed, where 1 represents a full complement of mitochondria, 2 represents an overall reduced mitochondrial signal, 3 represents ~10% of cells with no mitochondrial signal, and 4 represents >20% of cells with no mitochondrial signal.

**Lysate Preparation and Immunoblotting.** Cells were lysed in lysis buffer [50 mM Tris-HCl, 150 mM NaCl, 10% (vol/vol) glycerol, 1% Triton X-100, 10 mM *N*-ethylmaleimide, 2 mM EGTA, 1 mM MgCl<sub>2</sub>, 50  $\mu$ M MG-132, and protease inhibitor mixture (Roche)]. Lysates were resolved by SDS/PAGE, transferred to PVDF (Bio-Rad), and incubated with primary antibodies. Immunoreactive bands were detected using enhanced chemiluminescence reagent (Amersham) per the manufacturer's instructions and exposed to light-sensitive photograph film (Amersham). Immunoblots were quantified using the ImageJ (National Institutes of Health) plug-in “Gels” and normalized to loading controls.

**Assessing Starvation-Induced Autophagy.** HeLa cells were transfected with 25 nM siRNA as indicated and incubated for 4 d. The medium was replaced with fresh medium (U, untreated), HBSS (Invitrogen) (S, starvation), 20 nM bafilomycin A<sub>1</sub>-containing media (Sigma) (B, bafilomycin A<sub>1</sub>), or 20 nM bafilomycin A<sub>1</sub>-containing HBSS (S&B) for 2 h. Protein samples were collected, and endogenous LC3 was analyzed using SDS/PAGE. Immunoblots were quantified using ImageJ. Assays were performed in triplicate, and the mean “LC3-II/total LC3” ratio was calculated per sample.

**Quantitative Real-Time PCR.** RNA was extracted using an RNeasy RNA purification kit (Qiagen), and cDNA was synthesized using a Protoscript II first-strand cDNA synthesis kit (New England BioLabs) according to each manufacturer's instructions. Quantitative real-time PCR (qRT-PCR) was performed using a standard protocol, and each sample was normalized to the ribosomal reference gene, *RNA18S5*. A list of primers is available upon request. Relative gene expression was calculated using the  $2^{-\Delta\Delta CT}$  (cycle threshold) method. The primers used for qRT-PCR are as follows:

*RNA18S5*: CAGCCACCCGAGATTGAGCA, TAGTAGC-GACGGGCGGTGTG

*PINK1*: GCCGGACGCTGTTCCCTCGTT, TGGACACCTC-TGGGGCCATC

*Parkin*: CACACTGACAGCAGGAAGGA, AGGGGCCTT-TGCAATACA

*FBXW7*: GGGCACCAGTCGTTAACAAG, GTCACAGCA-CTCTGATGCTTG

*SREBF1*: CGTGCTGGGCACCGAGAGC, GGCCGTGTG-ACTGGCTCACC



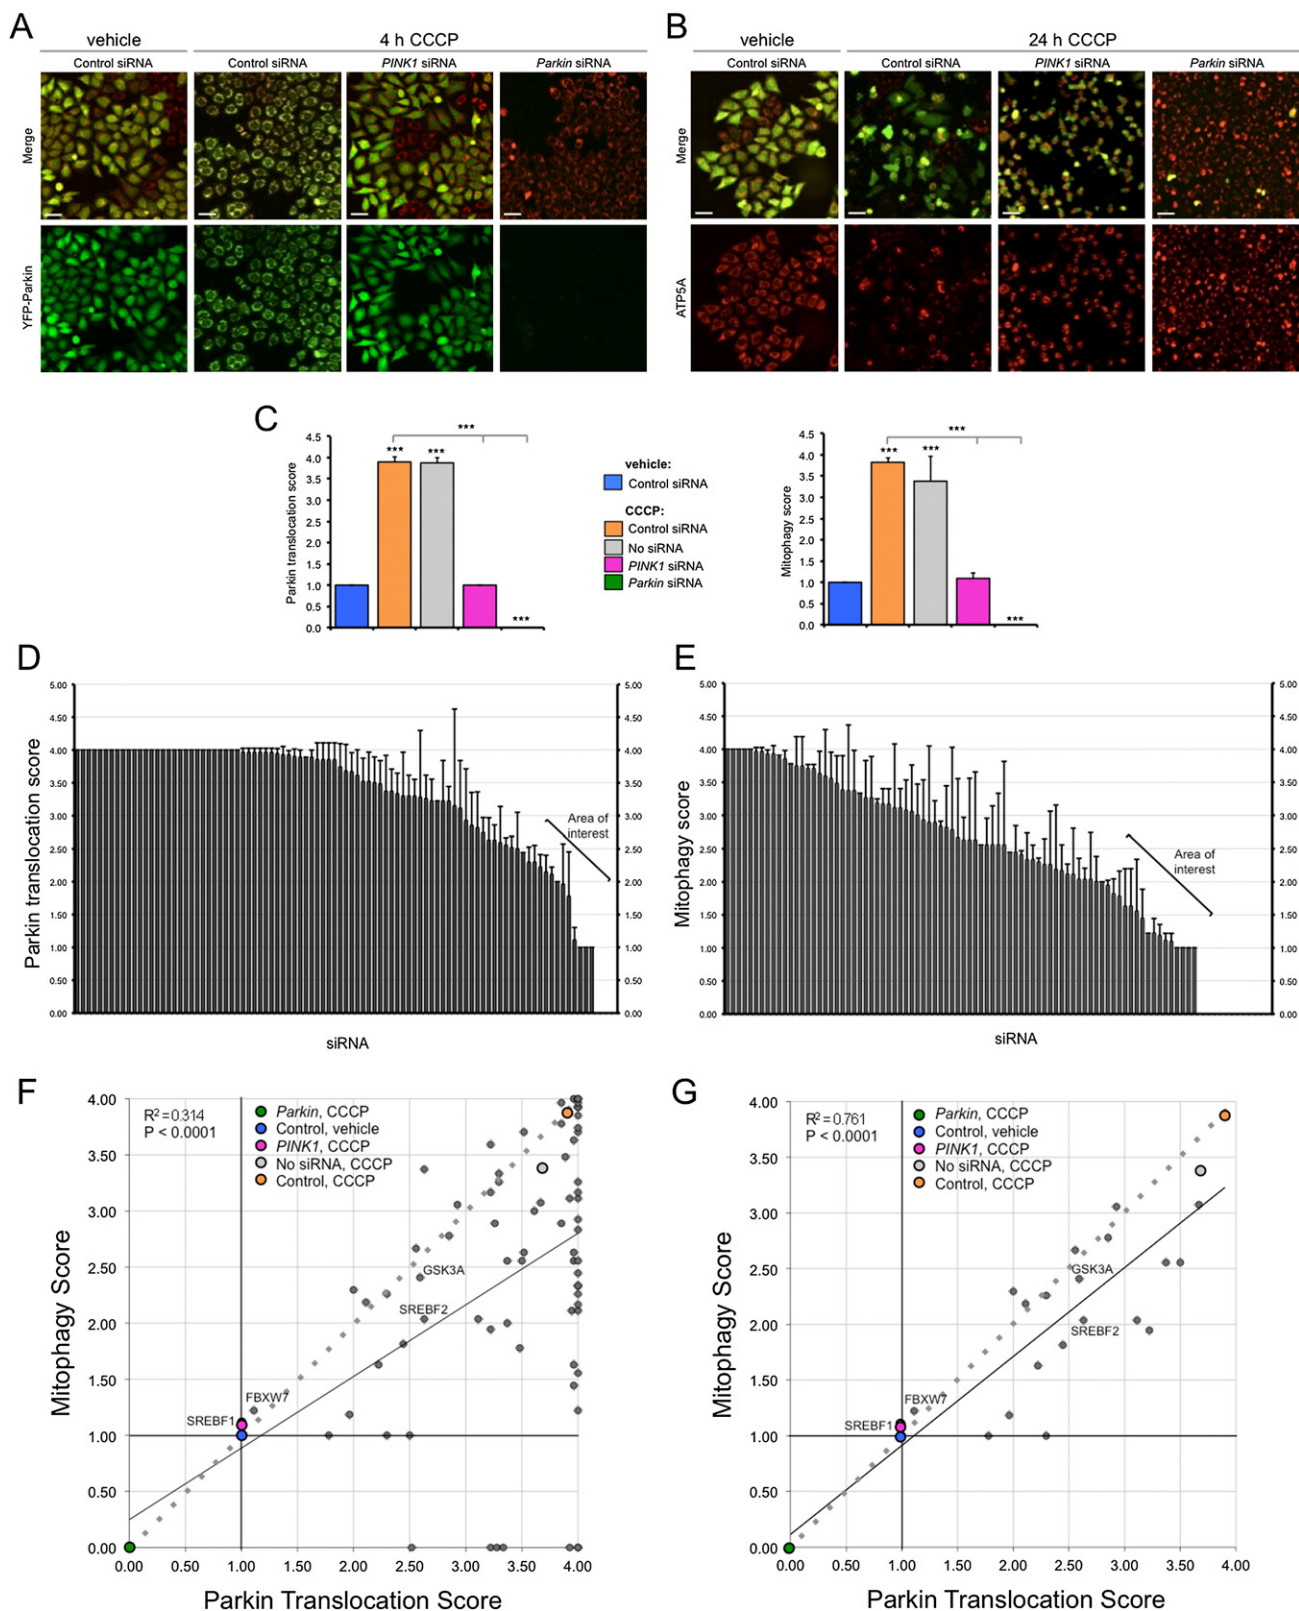

to *PINK1* siRNA are highlighted as the "area of interest." (F and G) Linear regression analysis of Parkin translocation and mitophagy scores. Scatter graph representation of the Parkin translocation score (x axis) against the mitophagy score (y axis) of all candidate siRNAs tested (F) or only the 20 hits (G). Colored data points represent screen controls (see key). Solid lines represent the line of best fit and correspond to the linear regression line equation ( $y$ ). Also included is the "coefficient of determination" ( $R^2$ ) values and significance of the positive data correlation ( $P$ ). Dashed lines represent  $R^2 = 1$ .

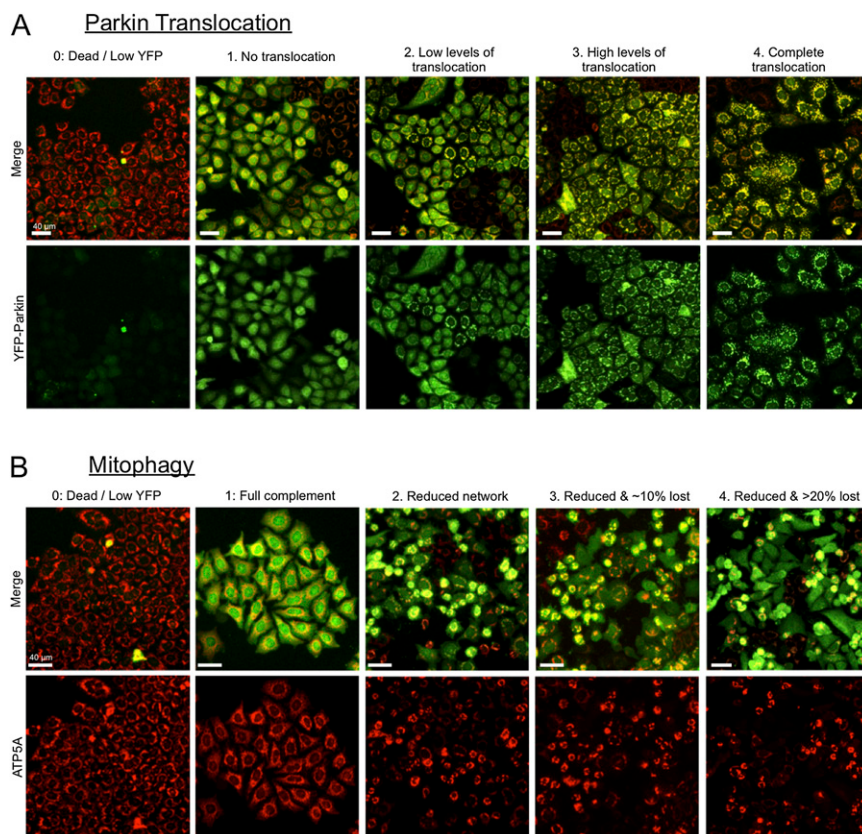

**Fig. S3.** HeLa cell scoring scheme for Parkin translocation and mitophagy. Example images of the scoring system used to assess Parkin translocation (A) and mitophagy (B) in a CCCP-treated HeLa cell line stably expressing pLVX-Puro-YFP-Parkin (YFP-Parkin.HeLa) cells. Cells were toxicified with 10  $\mu$ M CCCP for 4 h (A) or 24 h (B). (A) YFP-Parkin translocation (green) was assessed manually according to the following five criteria: 0 = dead cells or low YFP expression, 1 = <10% of cells with Parkin translocation, 2 = 10–50% of cells with Parkin translocation, 3 = 50–90% of cells with Parkin translocation, 4 = >90% of cells with Parkin translocation. (B) Mitophagy was assessed manually by loss of the ATP5A marker (red) according to the following five criteria: 0 = dead cells or low YFP expression, 1 = full complement of mitochondria, 2 = cells with a predominantly reduced mitochondrial network, 3 = cells with a reduced mitochondrial network and ~10% of the population with no mitochondria, 4 = cells with a reduced network and >20% of the population with no mitochondria. Images were captured using an ImageXpress Micro wide-field high-content screening microscope with a 10 $\times$  objective (Molecular Devices). (Scale bars: 40  $\mu$ m.)



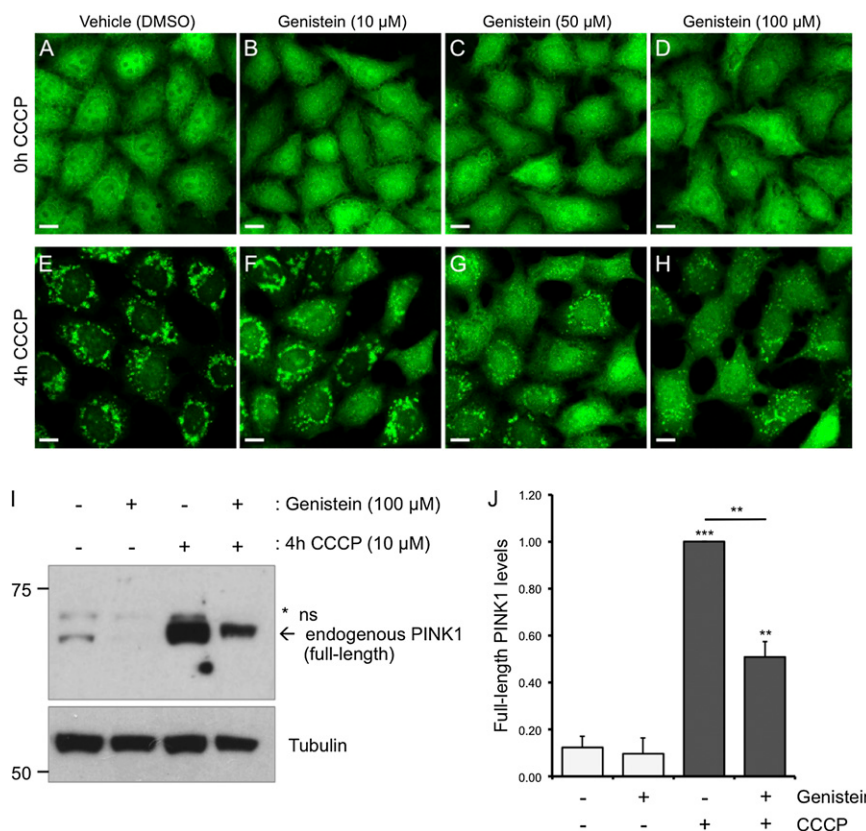

**Fig. S5.** Chemical inhibition of the sterol regulatory binding protein (SREBP) pathway by genistein treatment. HeLa cells expressing YFP-Parkin were treated with either vehicle (A and E) or genistein (B–D and F–H) over a range of concentrations [10  $\mu$ M (B and F), 50  $\mu$ M (C and G), and 100  $\mu$ M (D and H)] for 24 h before the application of vehicle (A and E) or 10  $\mu$ M CCCP (B–D and F–H) for 4 h. YFP-Parkin translocation was assessed qualitatively. (Scale bars: 10  $\mu$ m.) (I) HeLa cells were treated with either vehicle or 100  $\mu$ M genistein for 24 h before the application of vehicle or 10  $\mu$ M CCCP for 4 h. Alterations in endogenous full-length PINK1 levels were assessed by immunoblotting. Tubulin was used as a loading control. (J) Quantification of endogenous full-length PINK1 levels. The chart represents mean  $\pm$  SEM of triplicate assays. \*\* $P$  < 0.01; \*\*\* $P$  < 0.001 compared with vehicle-treated samples unless otherwise indicated (one-way ANOVA with Bonferroni correction).

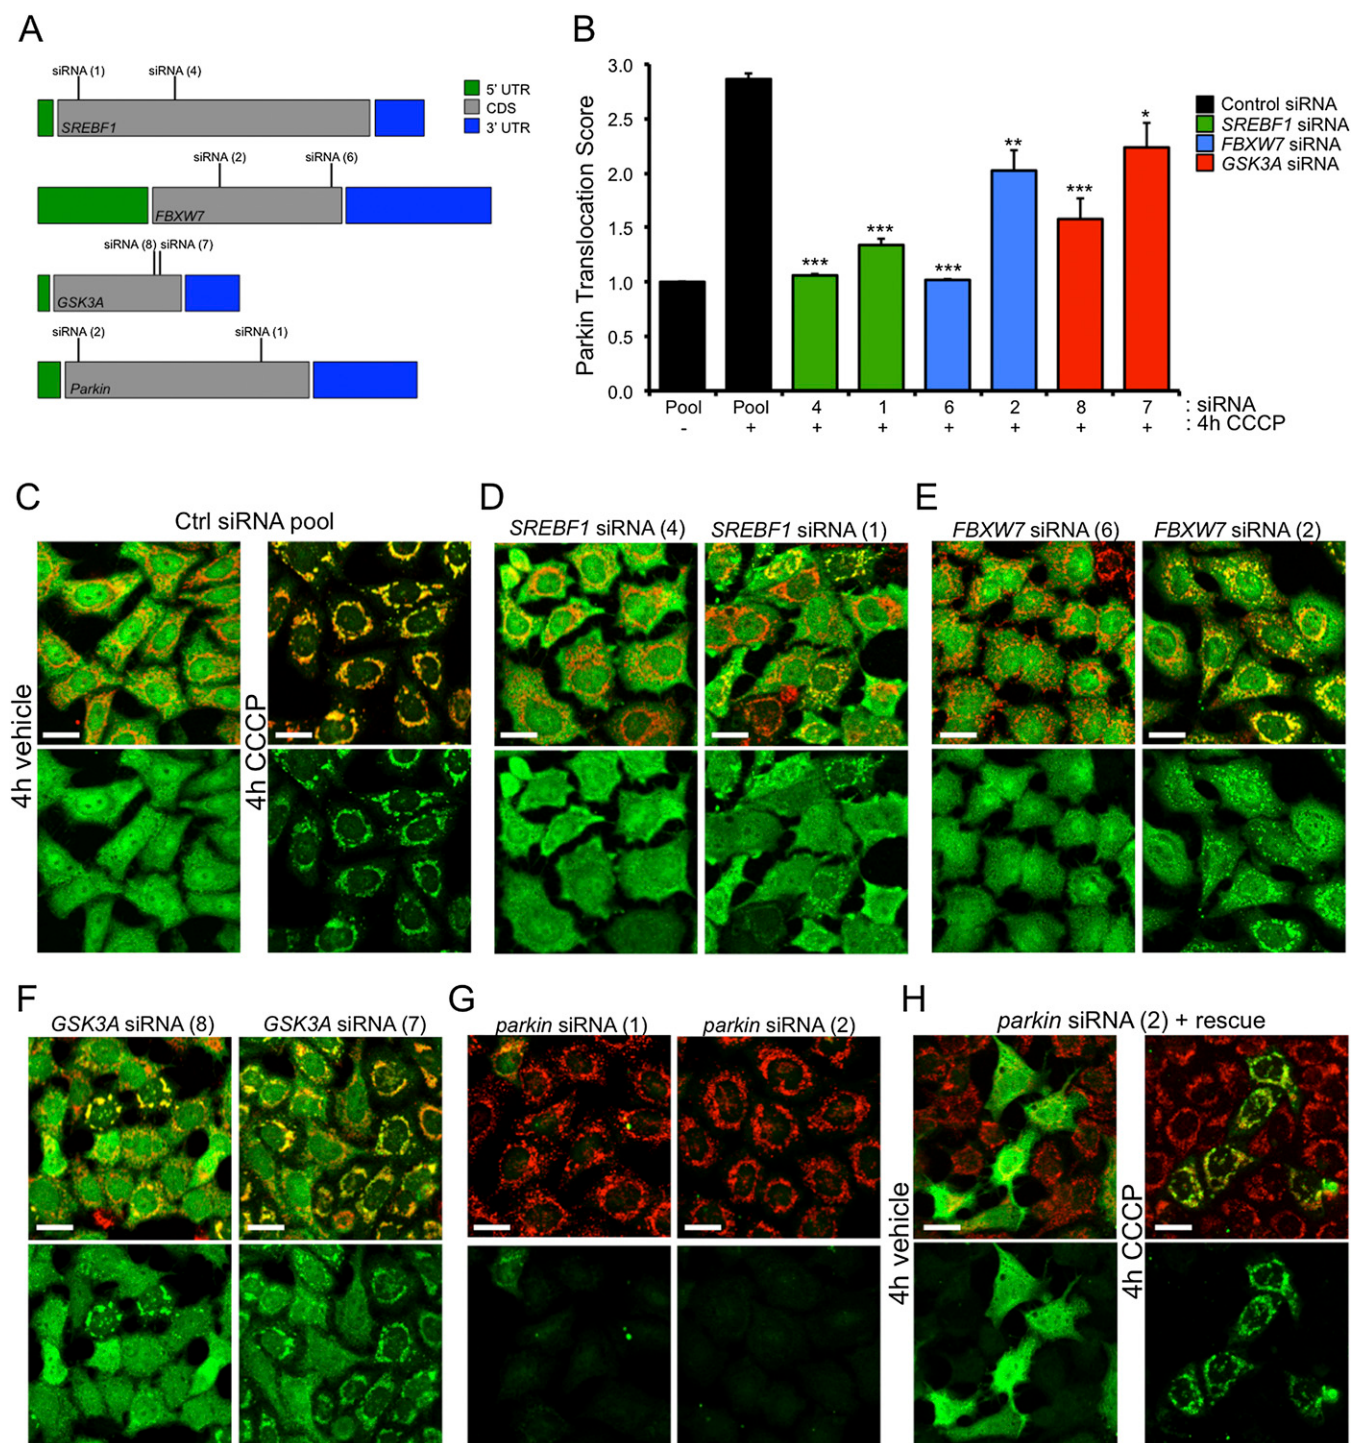

**Fig. S6.** Deconvolution of siRNA SMART pools. (A) Schematic of individual siRNA target regions within corresponding mRNAs. (B–G) HeLa cells expressing YFP-Parkin (green) were transfected with either pooled (C) or individual (D–G) siRNAs and treated with either vehicle (C) or CCCP (10  $\mu$ M) (C–G) for 4 h as indicated. (B) YFP-Parkin translocation to mitochondria (anti-ATP5A; red) was analyzed, producing a Parkin translocation score for each condition. The chart represents mean  $\pm$  SEM of triplicate assays. \*\*\* $P$  < 0.0001; \*\* $P$  < 0.01; \* $P$  < 0.05 (one-way ANOVA with Bonferroni correction, compared with "Control, 4-h CCCP" samples). (G) HeLa cells expressing YFP-Parkin (green) and transfected with two individual siRNAs targeting *Parkin* lead to a marked decrease of YFP-Parkin signal. (H) Cotransfection of an individual *parkin* siRNA and a corresponding "siRNA-resistant" YFP-Parkin construct leads to the rescue of YFP-Parkin expression, and its translocation to mitochondria (red) following treatment with CCCP (10  $\mu$ M) for 4 h. (Scale bars: 20  $\mu$ m.)

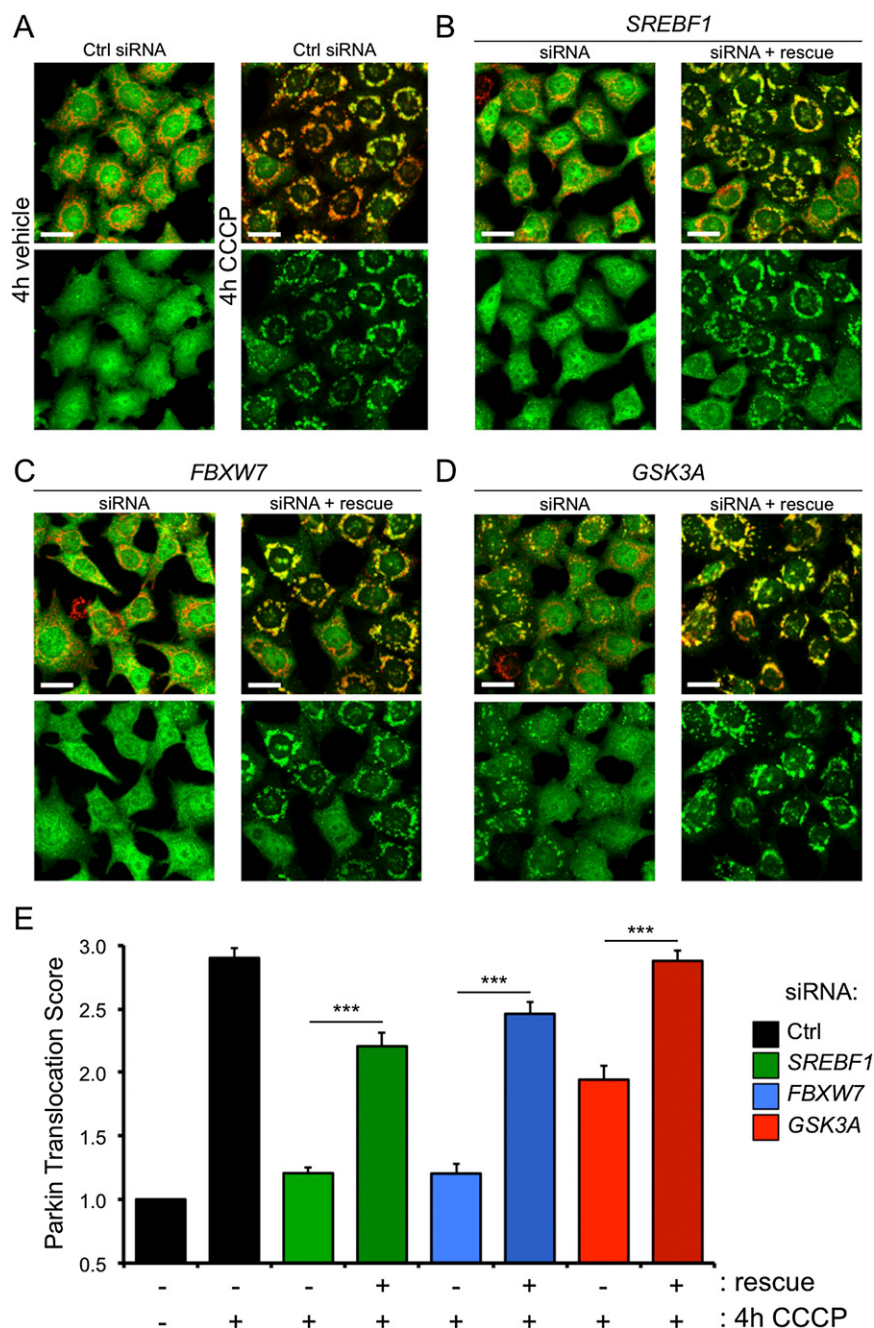

**Fig. S7.** Rescue of Parkin translocation with siRNA-resistant constructs. HeLa cells expressing YFP-Parkin (green) were transfected with either pooled (A) or individual (B–D) siRNAs alone or with corresponding siRNA-resistant “rescue” constructs (B–D) and treated with either vehicle (A) or CCCP (10  $\mu$ M) (A–D) for 4 h as indicated. (E) YFP-Parkin translocation to mitochondria (anti-ATP5A; red) was assessed, producing a Parkin translocation score for each condition. The chart represents mean  $\pm$  SD of triplicate assays. \*\*\* $P$  < 0.001 (Student’s  $t$  test between equivalent siRNA-treated samples). (Scale bars: 20  $\mu$ m.)



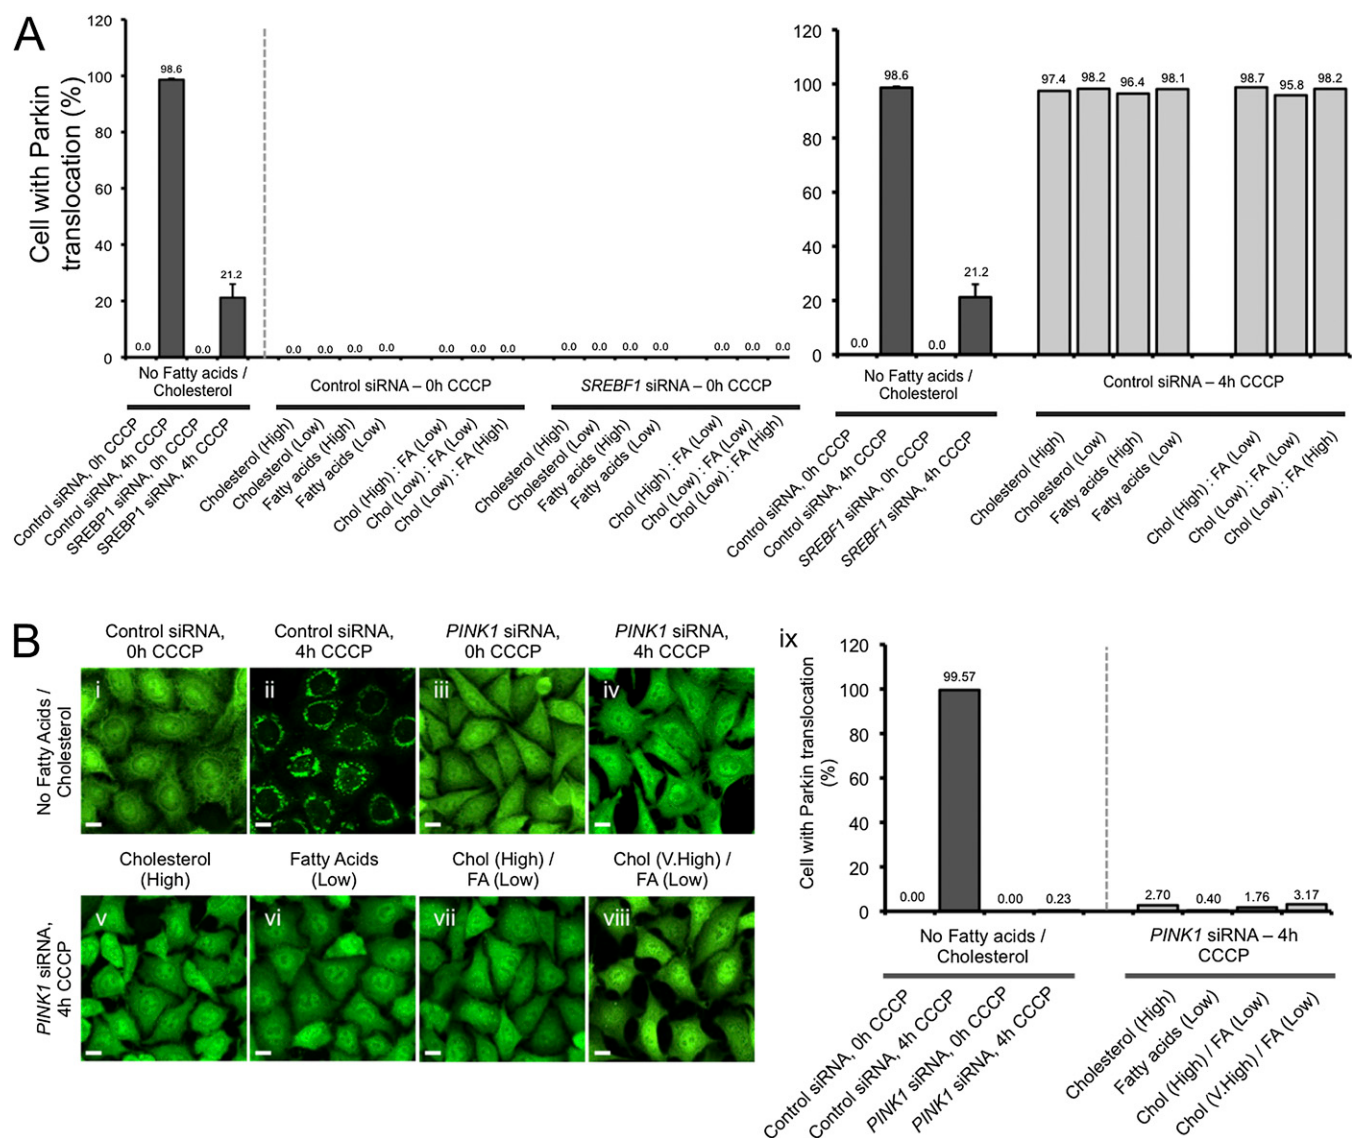

**Fig. 59.** Parkin translocation with fatty acids and cholesterol; analysis of controls. (A) HeLa cells expressing YFP-Parkin were treated with control or *SREBF1* siRNA and exposed to cholesterol, fatty acids, or a combination of the two at varying concentrations. Cells were treated with 10  $\mu$ M CCCP or vehicle for 4 h as indicated, and the degree of Parkin translocation was quantified manually as the percentage of cells with Parkin translocation. (B) HeLa cells expressing YFP-Parkin were treated with control or *PINK1* siRNA for 4 d before the addition of vehicle (i–iv), cholesterol (v), fatty acids (vi), or a combination (vii and viii) for 24 h. Samples were then treated with either vehicle (i and iii) or 10  $\mu$ M CCCP (ii and iv–viii) for 4 h. YFP-Parkin translocation (green) was assessed quantitatively as the percentage of cells with Parkin translocation. (ix) Quantification of Parkin translocation as in i–viii. Charts represent the mean of five fields of view per condition, from a single assay. Chol, cholesterol; FA, fatty acids; High, high concentration; Low, low concentration; V.High, very high concentration. (Scale bars: 10  $\mu$ m.)

| No. | Name           | P | M | C                        | Human homolog(s)                       |
|-----|----------------|---|---|--------------------------|----------------------------------------|
| 1   | ago            | P | M | C                        | FBXW7                                  |
| 2   | atms           |   |   |                          | PAF1                                   |
| 3   | CG2469         |   |   |                          | CTR9                                   |
| 4   | Ctr1A          |   |   |                          | SLC31A1                                |
| 5   | Lilli          |   |   |                          | AFF4, AFF1, AFF3, AFF2                 |
| 6   | MED14          |   |   |                          | MED14                                  |
| 7   | MED19          |   |   |                          | MED19                                  |
| 8   | MED24          |   |   |                          | MED24                                  |
| 9   | MED7           |   |   |                          | MED7                                   |
| 10  | Pcaf           |   |   |                          | KAT2A, KAT2B                           |
| 11  | pUf68          |   |   |                          | PUF60                                  |
| 12  | Rpb10          |   |   |                          | POLR2L                                 |
| 13  | Rpb5           |   |   |                          | POLR2E                                 |
| 14  | Rpb8           |   |   |                          | POLR2H                                 |
| 15  | sgg*           |   |   |                          | GSK3B, GSK3A                           |
| 16  | tlk*           |   |   |                          | TLK2, TLK1                             |
| 17  | U2af50         |   |   |                          | U2AF2                                  |
| 18  | ab             |   |   |                          | ZBTB22, ZNF295, ZBTB37, ZBTB17, ZBTB39 |
| 19  | BAP55          |   |   |                          | ACTL6A, ACTL6B                         |
| 20  | Cdk9           |   |   |                          | CDK9                                   |
| 21  | CG12050        |   |   |                          | WDR75                                  |
| 22  | CG14023        |   |   |                          | NCOA6                                  |
| 23  | CG14239        |   |   |                          | —                                      |
| 24  | CG17209        |   |   |                          | POLR3A                                 |
| 25  | CG34449        |   |   |                          | ZDHHC8, ZDHHC5                         |
| 26  | CG6220         |   |   |                          | CDC73                                  |
| 27  | CG9883         |   |   |                          | —                                      |
| 28  | Ckl1 $\alpha$  |   |   |                          | CSNK2A1, CSNK2A2                       |
| 29  | cn             |   |   |                          | KMO                                    |
| 30  | Gclm           |   |   |                          | GCLM                                   |
| 31  | l(2)01810      |   |   |                          | SLC17A3, SLC17A9                       |
| 32  | Pros25         |   |   |                          | PSMA2                                  |
| 33  | RpL28          |   |   |                          | RPL28                                  |
| 34  | scny           |   |   |                          | USP36, USP42                           |
| 35  | U2af38         |   |   |                          | U2AF1, U2AF1L4                         |
| 36  | CG2685         | M | C | WBP11                    |                                        |
| 37  | CG5591         |   |   | MLL3                     |                                        |
| 38  | CG7886         |   |   | CEP78                    |                                        |
| 39  | Cp1            |   |   | CTSL2, CTSL1, CTSS, CTSK |                                        |
| 40  | Dis3           |   |   | DIS3                     |                                        |
| 41  | l(1)G0007      |   |   | DHX38                    |                                        |
| 42  | ptip           |   |   | PAXIP1                   |                                        |
| 43  | Rrp6           |   |   | EXOSC10                  |                                        |
| 44  | Srp54          |   |   | SREK1, SRSF11            |                                        |
| 45  | TfllF $\alpha$ |   |   | GTF2F1                   |                                        |
| 46  | Atu            | P | M | C                        | LEO1                                   |
| 47  | CG33051        |   |   |                          | POLR3G, POLR3GL                        |

**Table S1. Cont.**

| No. | Name       | P | M | C | Human homolog(s) |
|-----|------------|---|---|---|------------------|
| 48  | HLH106     |   |   |   | SREBF1, SREBF2   |
| 49  | Maltase A5 |   |   |   | SLC3A1           |
| 50  | pic        |   |   |   | DDB1             |
| 51  | Prp31      |   |   |   | PRPF31           |
| 52  | CG15459    |   |   |   | USMG5            |
| 53  | faf        |   |   |   | USP9X, USP9Y     |
| 54  | fz3        |   |   |   | FZD5             |
| 55  | GATAe      |   |   |   | GATA4            |
| 56  | MED28      |   |   |   | MED28            |
| 57  | pont       |   |   |   | RUVBL1           |
| 58  | rept       |   |   |   | RUVBL2           |
| 59  | sec10      |   |   |   | EXOC5            |
| 60  | Tango6     |   |   |   | TMCO7            |

C, mitochondrial perinuclear clustering; M, mitochondrial morphology; P, paraquat-induced Parkin translocation. Green indicates a gene scored as a hit, and red indicates no effect (not a hit). The closest human homologs of the *Drosophila* genes are shown.

\*Genes with multiple amplicons recovered in the primary screen.

## Other Supporting Information Files

[Dataset S1 \(XLS\)](#)
